# Supplementary material for: Thermodynamic Performance Study on the Novel Efficient Flow Pattern Global Construction Evaporator
Source: Research Square preprint supplement (doi:10.21203/rs.3.rs-620448/v1), 2021-06-14
Supplement: Supplementary file 1 [file a58c78990e1f7188cc760c11.docx]

Table 1 Parameters of the evaporator

| Items | Size | Items | Size |
| --- | --- | --- | --- |
| Flow length (EFGE and PFE) /m | 6.0 | Addendum angle /° | 53 |
| Diameter of header (EFGE and PFE) /mm | 20 | Helical angle /° | 18 |
| Header length (EFGE and PFE) /mm | 506 | Fin thickness /mm | 0.12 |
| Hole number/ hole diameter/ conduit pipe length (2nd pass) /mm | 2/4 /5&22 | Tube pitch in vertical/ mm | 21 |
| Hole number/ hole diameter/ conduit pipe length (3rd pass) /mm | 2/4 /5&22 | Fin height /mm | 0.15 |
| Hole number/ hole diameter/ conduit pipe length (4th pass) /mm | 2/4 /5&22 | Tube number | 22 |
| Hole number/ hole diameter/ conduit pipe length (5th pass) /mm | 3/4 /5&22 | Tube length /mm | 500 |
| Hole number/ hole diameter/ conduit pipe length (6th pass) /mm | 3/4 /5&22 | Thread number | 60 |
| Hole number/ hole diameter/ conduit pipe length (7th pass) /mm | 3/4 /5&22 | Outer diameter /mm | 7.3 |
| Hole number/ hole diameter/ conduit pipe length (8th pass) /mm | 3/4 /5&22 | Tip diameter /mm | 6.7 |
| Hole number/ hole diameter/ conduit pipe length (9th pass) /mm | 3/4 /5&22 | Fin pitch /mm | 1.36 |

Table 2 Uncertainty of the measuring apparatus

| Items | Type | Range | Accuracy |
| --- | --- | --- | --- |
| Pt-100 | TR/02010 | 223 K to 473 K | ± 0.1 K |
| Thermocouple | Type-T | 73 K to 623 K | ± 0.5 K |
| Pressure transducer | Diffused-silicon EL-P300 | 0 MPa to 1 MPa | ±0.2% |
| Air current meter | Thermistor-type GM8903 | 0.1 m to 30 m | ± 1.0% |
| Mass flow meter | Coriolis effect | 0 kgs-1 to 0.2 kgs-1 | ± 0.15% |
| Ruler | Tape | 0 m to 3 m | ± 0.001 m |
| power meter | ZW3433B | 0 to 4000 W | ±0.5% |

Table 3 The operating condition

| Items | Range |
| --- | --- |
| Refrigerant | R22 |
| Evaporating temperature /K | 280.15 |
| Heat load /kW | 0.45 |
| Inlet mass flux /kgm-2s-1 | 340 & 650 |
| Vapor quality range | 0.0 to 1.0 |
